# Supplementary material for: Active control of molecular stacking types in a congeneric library of dihalogenated salicylideneaniline crystals and their solid solutions
Source: Royal Society of Chemistry journal article supplement (doi:10.1039/d3ce00601h), 2023-01-01
Supplement: d3ce00601h1.pdf [file d3ce00601h1.pdf]

## Supporting information

### Experimental Section

#### *Synthesis.*

**4CB:** To a dichloromethane solution (3ml) of 4-chlorosalicylaldehyde (2.04 mmol, 320 mg), 4-bromoaniline (356 mg, 2.07 mmol) was added and stirred for 5 hours. To remove water in the mother liquid, dehydrated sodium sulfate was added and filtered off. Methanol was added and the solution was stored in refrigerator for a day. Yellow crystals were collected by filtration, and dried under reduced pressure. Yield: 523 mg (84%).

**4BB, 4BC:** To a methanolic solution (5ml) of 4-bromosalicylaldehyde (1.00 mmol, 201 mg), 4-bromoaniline (1.01 mmol, 173 mg) or 4-chloroaniline (1.00 mmol, 128mg) was added, and stored for a day. Yellow crystals were collected by filtration, and dried under reduced pressure. Yield: **4BB:** 323 mg, (91%), **4BC:** 278 mg (90 %).

**4BB:** Elemental Analysis for  $C_{13}H_9Br_2NO$ : Calcd. C, 43.98; H, 2.56; N, 3.95. Found: C, 44.16; H, 2.34; N, 4.10. FAB MS(+) m/z 354.0, 356.1, 358.1 (calcd. 353.9, 355.9, 357.9 for  $M + H^+$ ).  $^1H$  NMR ( $CDCl_3$ ):  $\delta$  7.09 (1H, dd,  $J = 8.2, 1.8$  Hz, ArH), 7.16(2H, m, ArH), 7.22 (1H, d,  $J = 1.8$  Hz, ArH), 7.24 (1H, d,  $J = 8.2$ Hz, ArH), 7.55 (2H, m, ArH), 8.57 (1H, s, N=CH-), 13.28 (1H, br, OH),  $^{13}C$  NMR ( $CDCl_3$ ):  $\delta = 118.1, 120.8, 120.9, 122.8, 122.9, 127.9, 132.7, 133.4, 147.2, 161.9, 162.2$ .

**4BC:** Elemental Analysis for  $C_{13}H_9BrClNO$ : Calcd. C, 50.28; H, 2.92; N, 4.51. Found: C, 50.26; H, 2.85; N, 4.63. FAB MS(+) m/z 310.2, 312.1 (calcd. 310.0, 312.0 for  $M + H^+$ ).  $^1H$  NMR ( $CDCl_3$ ):  $\delta$  7.09 (1H, dd,  $J = 8.2, 1.8$  Hz, AH), 7.2-7.26 (3H, m, ArH), 7.16 (2H, m, ArH), 7.32 (1H, d,  $J = 8.2$  Hz, ArH), 7.40 (2H, m, ArH), 8.56 (1H, s, N=CH-), 13.30 (1H, br, OH),  $^{13}C$  NMR ( $CDCl_3$ ):  $\delta = 118.1, 120.8, 122.6, 122.8, 127.9, 129.8, 133.0, 133.4, 146.7, 161.9, 162.2$ .

**4CB:** Elemental Analysis for  $C_{13}H_9BrClNO$ : Calcd. C, 50.28; H, 2.92; N, 4.51. Found: C, 50.17; H, 2.85; N, 4.64. FAB MS(+) m/z 310.1, 312.1 (calcd. 310.0, 312.0 for  $M + H^+$ ).  $^1H$  NMR ( $CDCl_3$ ):  $\delta$  6.93 (1H, dd,  $J = 8.3, 1.9$  Hz, A-H), 7.04 (1H, d,  $J = 1.9$  Hz, ArH), 7.16 (2H, m, ArH), 7.32 (1H, d,  $J = 8.2$  Hz, ArH), 7.55 (2H, m, ArH), 8.57 (1H, s, N=CH-), 13.31 (1H, br, OH),  $^{13}C$  NMR ( $CDCl_3$ ):  $\delta = 117.8, 117.8, 119.9, 120.8, 122.9, 132.7, 133.3, 139.4, 147.2, 162.0, 162.1$ .

**Table S1** Crystallographic parameters of 4XY

|                           | m-4BB                | o <sub>1</sub> -4BB       | o <sub>2</sub> -4BB | 4BC                                | 4CB          | 4CC-y <sup>†</sup>   | 4CC-o <sup>†</sup>                 |
|---------------------------|----------------------|---------------------------|---------------------|------------------------------------|--------------|----------------------|------------------------------------|
| crystal habit             | plate                | plate                     | plate               | plate                              | plate        | plate                | plate                              |
| crystal color             | yellow               | yellow                    | yellow              | yellow                             | yellow       | yellow               | orange                             |
| crystal system            | monoclinic           | orthorhombic              | orthorhombic        | monoclinic                         | orthorhombic | monoclinic           | monoclinic                         |
| space group               | <i>I</i> 2/ <i>a</i> | <i>Pca</i> 2 <sub>1</sub> | <i>Pccn</i>         | <i>P</i> 2 <sub>1</sub> / <i>c</i> | <i>Pccn</i>  | <i>I</i> 2/ <i>c</i> | <i>P</i> 2 <sub>1</sub> / <i>c</i> |
| <i>a</i> / Å              | 6.1745(3)            | 6.0569(1)                 | 56.5791(10)         | 27.8584(9)                         | 55.8702(10)  | 6.140(5)             | 10.004(6)                          |
| <i>b</i> / Å              | 6.8716(3)            | 6.9330(1)                 | 6.8940(1)           | 6.8627(3)                          | 6.9161(2)    | 6.848(6)             | 4.688(3)                           |
| <i>c</i> / Å              | 28.3078(12)          | 28.5038(3)                | 6.1018(1)           | 6.1547(2)                          | 6.1083(1)    | 27.39(2)             | 11.919(7)                          |
| $\beta$ / °               | 96.189(4)            | 90                        | 90                  | 95.840(3)                          | 90           | 95.26(2)             | 93.2393(10)                        |
| <i>V</i> / Å <sup>3</sup> | 1194.06(9)           | 1196.95(3)                | 2380.05(7)          | 1170.57(7)                         | 2360.27(9)   | 1146.8(16)           | 558.1(6)                           |
| <i>D</i> <sub>calcd</sub> | 1.975                | 1.970                     | 1.982               | 1.762                              | 1.748        | 1.541                | 1.584                              |
| <i>Z</i>                  | 4                    | 4                         | 8                   | 4                                  | 8            | 4                    | 2                                  |
| <i>Z'</i>                 | 0.5                  | 1                         | 1                   | 1                                  | 1            | 0.5                  | 0.5                                |
| <i>T</i> / K              | 93                   | 93                        | 103*                | 93                                 | 153*         | 93                   | 93                                 |
| <i>R</i>                  | 0.0410               | 0.0306                    | 0.054               | 0.0662                             | 0.1145       | 0.0447               | 0.0504                             |
| <i>R</i> <sub>w</sub>     | 0.0958               | 0.0843                    | 0.1194              | 0.1299                             | 0.2599       | 0.1002               | 0.1208                             |

†: ref. 1, \*: due to a temperature controller condition, we could not collect the data at 93K.

**Table S2** Geometric parameters of 4XY crystals

|                     | C-O (Å)  | C=N (Å)  | $\varphi_1$ (°) | $\varphi_2$ (°) | $\theta$ (°) |
|---------------------|----------|----------|-----------------|-----------------|--------------|
| m-4BB               | 1.356(6) | 1.29(2)  | 4(3)            | 39(2)           | 45.91        |
| o <sub>1</sub> -4BB | 1.340(9) | 1.29(1)  | -8(1)           | -36(1)          | 46.82        |
| o <sub>2</sub> -4BB | 1.352(8) | 1.277(8) | -7.9(9)         | -35.8(9)        | 46.08        |
| 4BC <sup>†</sup>    | 1.358(6) | 1.28(1)  | -10(2)          | -33(1)          | 45.91        |
| 4CB                 | 1.36(1)  | 1.28(1)  | 7(2)            | 35(2)           | 46.31        |
| 4CC-Y               | 1.368(4) | 1.28(1)  | -7.8(9)         | -35.0(8)        | 46.13        |
| 4CC-O               | 1.310(6) | 1.27(2)  | 2(2)            | -4(2)           | 0            |

$\varphi_1$ : dihedral angle of C<sub>2</sub>-C<sub>1</sub>-C=N,  $\varphi_2$ : dihedral angle of C<sub>2</sub>-C<sub>1</sub>-N=C (Aniline side),  $\theta$ : angles between the normal vectors of two benzene rings, †: major part

**Table S3** Crystallographic parameters of 5XY

|                           | 5BB          | 5BC                     | 5CB          | 5CC-y                   | 5CC-o                   |
|---------------------------|--------------|-------------------------|--------------|-------------------------|-------------------------|
| crystal system            | orthorhombic | monoclinic              | orthorhombic | monoclinic              | monoclinic              |
| space group               | <i>Pccn</i>  | <i>P2<sub>1</sub>/c</i> | <i>Pccn</i>  | <i>P2<sub>1</sub>/c</i> | <i>P2<sub>1</sub>/c</i> |
| <i>a</i> / Å              | 56.4542(12)  | 27.652(11)              | 6.9964(15)   | 27.419(7)               | 20.427(6)               |
| <i>b</i> / Å              | 6.9020(2)    | 7.011(3)                | 55.786(12)   | 6.901(2)                | 4.5728(13)              |
| <i>c</i> / Å              | 6.10530(10)  | 6.219(3)                | 6.1443(14)   | 6.137(1)                | 12.101(4)               |
| $\beta$ / °               | 90           | 96.38(2)                | 90           | 95.57(2)                | 92.301(5)               |
| <i>V</i> / Å <sup>3</sup> | 2378.91(9)   | 1198.2(8)               | 2398.1(9)    | 1155.75                 | 1129.4(6)               |
| <i>D</i> <sub>calcd</sub> | 1.983        | 1.722                   | 1.72         | 1.529                   | 1.565                   |
| <i>Z</i>                  | 8            | 4                       | 8            | 4                       | 4                       |
| <i>Z'</i>                 | 1            | 1                       | 1            | 1                       | 1                       |
| <i>T</i> / K              | 93           | 296                     | 298          | 190                     | 93                      |
| <i>R</i>                  | 0.0391       | 0.031                   | 0.054        | 0.034                   | 0.0333                  |
| <i>R</i> <sub>w</sub>     | 0.0976       | 0.078                   | 0.128        | 0.0905                  | 0.083                   |
| Reference                 | This work    | ref. 2                  | ref. 3       | ref. 4                  | ref. 1                  |

**Table S4** Geometric parameters of 5XY crystals

|       | C-O (Å)  | C=N (Å)  | $\varphi_1$ (°) | $\varphi_2$ (°) | $\theta$ (°) |
|-------|----------|----------|-----------------|-----------------|--------------|
| 5BB   | 1.356(4) | 1.293(4) | 5.5(4)          | 36.0(4)         | 44.45        |
| 5BC   | 1.341(3) | 1.274(4) | -4.6(4)         | -35.6(4)        | 43.90        |
| 5CB   | 1.352(5) | 1.276(5) | 5.4(6)          | 35.8(6)         | 44.27        |
| 5CC-y | 1.352(3) | 1.280(3) | -5.4(4)         | -35.9(3)        | 44.55        |
| 5CC-o | 1.353(2) | 1.287(2) | 3.3(2)          | -6.0(2)         | 2.85         |

$\varphi_1$ : dihedral angle of C<sub>2</sub>-C<sub>1</sub>-C=N,  $\varphi_2$ : dihedral angle of C<sub>2</sub>-C<sub>1</sub>-N=C (Aniline side),  $\theta$ : angles between the normal vectors of two benzene rings

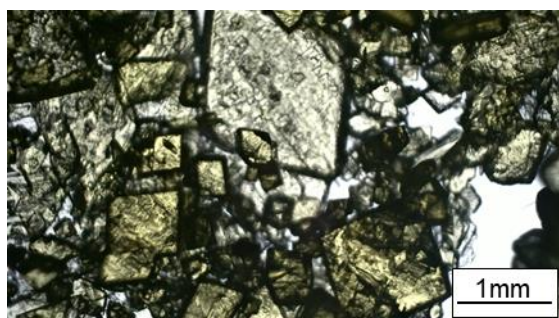

**Figure S1** 4BB crystals obtained from a mixed solution of dichloromethane and hexane. The crystals were a conglomerate of several polymorphs, all similar yellow platelets.

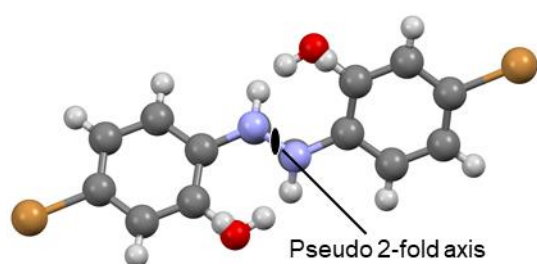

**Figure S2** Static disorder in m-4BB. The ratio of 1:1 for opposite orientations caused pseudo 2-fold axis on the center of imine bond.

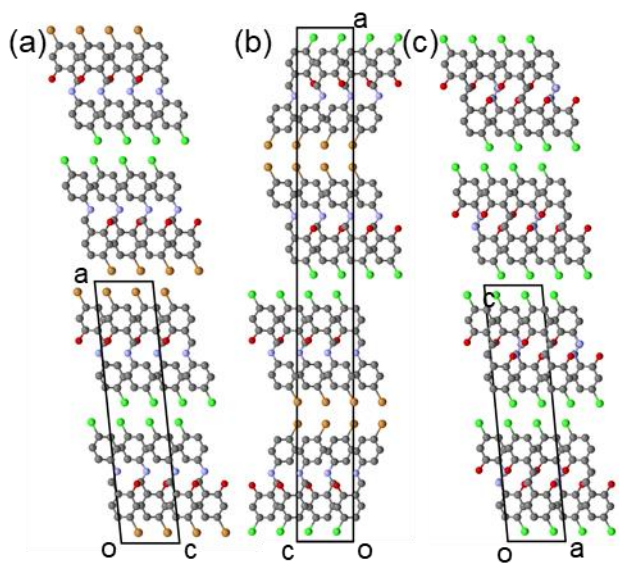

**Figure S3** Crystal packing of a) 4BC (major part), b) 4CB and c) 4CC-y.

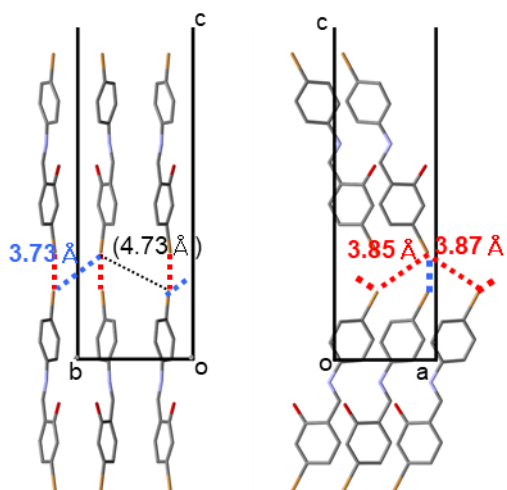

**Figure S4** Type-II halogen bond network along a-axis (red) and additional type-I halogen bond along b-axis (blue) in  $o_1$ -4BB crystal.

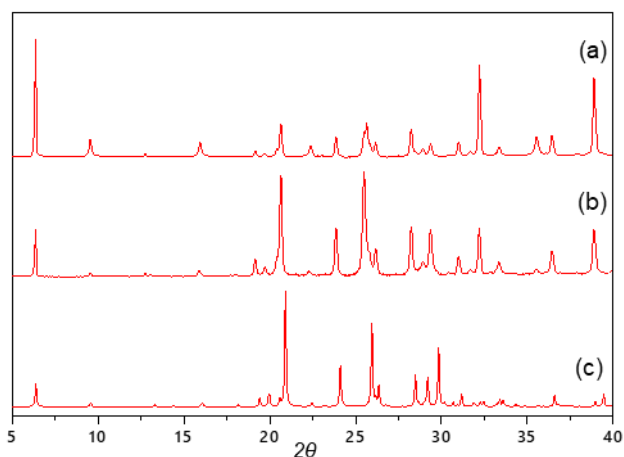

**Figure S5** Powder X-ray diffraction patterns of 4BC measured for the samples recrystallized from solution (a) and from melt (b), with simulated pattern for 4BC crystal (c).

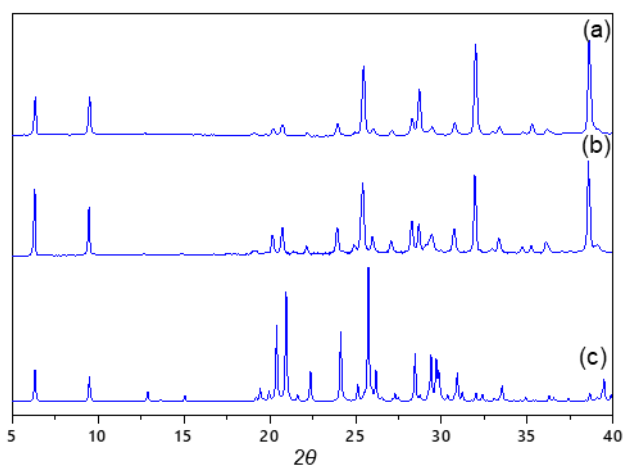

**Figure S6** Powder X-ray diffraction patterns of 4CB measured for the samples recrystallized from solution (a) and from melt (b), with simulated pattern for 4CB crystal (c).

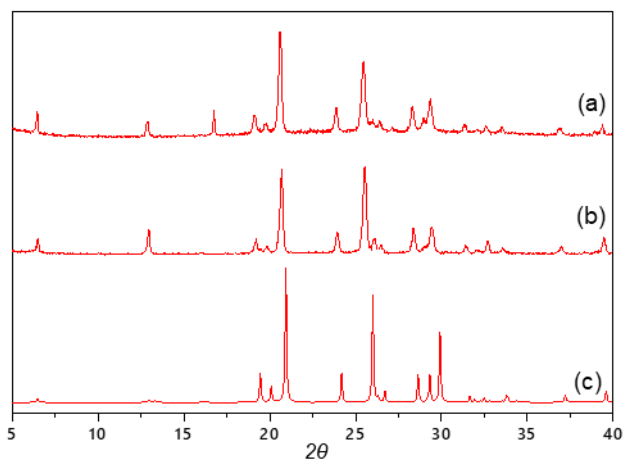

**Figure S7** Powder X-ray diffraction patterns of 4CC measured for 4CC recrystallized from solution (a) and from melt (b), with simulated pattern for 4CC-y crystal (c).

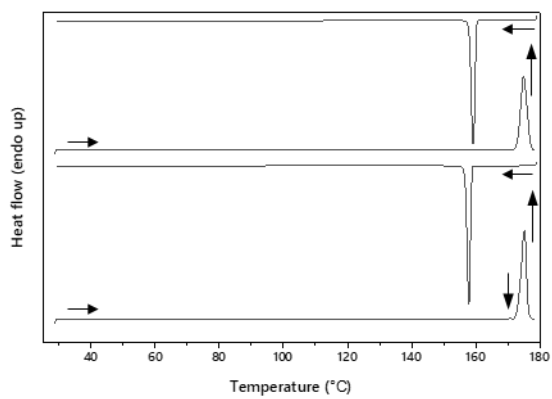

**Figure S8** DSC curves of 4BB.

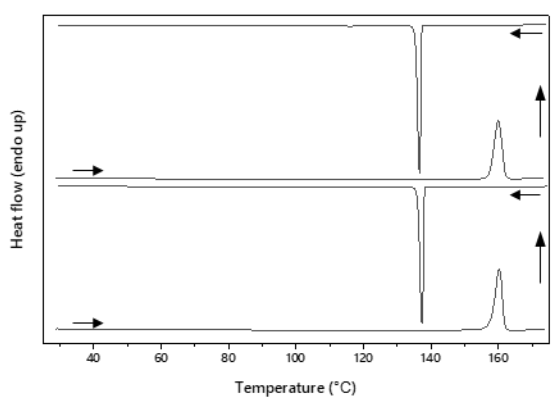

**Figure S9** DSC curves of 4BC

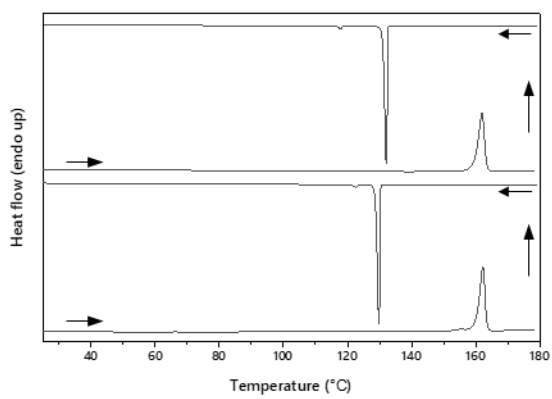

**Figure S10** DSC curves of 4CB

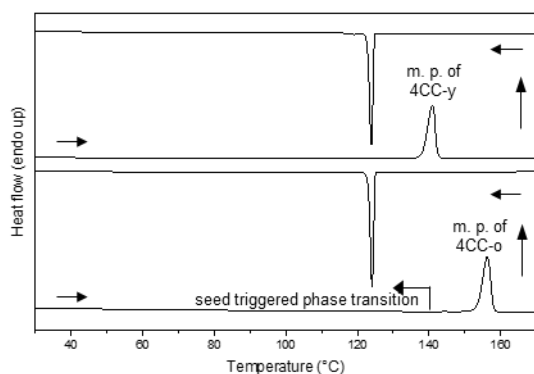

**Figure S11** DSC curves of 4CC-Y. Contamination of small amount of 4CC-o caused a seed-triggered phase transition to 4CC-o below the melting point of 4CC-y in the first heating curve.

### References for supporting information

- (1) Z. Zhang, M. Suzuki, Y. Yang, I. Yoshikawa, Q. Yin, and H. Houjou, *CrystEngComm* 2020, **22**, 4903–4913.
- (2) A. A. Ardakani, R. Kia, H. Kargar, and M. N. Tahir, *Acta Crystallogr. Sect. E Struct. Reports Online* 2011, **67**, o597–o597.
- (3) X.-L., S.-S. Feng, C.-X. Yuan, and M.-L. Zhu, *Acta Crystallogr. Sect. E Struct. Reports Online* 2014, **70**, o235–o236.
- (4) J. Burgess, J. Fawcett, D. R. Russell, S. R. Gilani, and V. Palma, *Acta Crystallogr. Sect. C Cryst. Struct. Commun.* 1999, **55**, 1707–1710.
